# Supplementary material
Source: PubMed Central journal article supplement (PMC7040946)

## Appendix 2: Activity-Specific Fractures by Location

| Fractures             | All Sports |         |      |          |          | In Line Skating |        |      |          |          | Ice Skating |        |      |          |          |
|-----------------------|------------|---------|------|----------|----------|-----------------|--------|------|----------|----------|-------------|--------|------|----------|----------|
|                       | n          | N       | %    | U 95% CL | L 95% CL | n               | N      | %    | U 95% CL | L 95% CL | n           | N      | %    | U 95% CL | L 95% CL |
| <b>Head</b>           | 262        | 11,458  | 0.3  | 14,974   | 8,735    | 4               | 48     | 0.1  | 134      | 14       | 6           | 227    | 0.5  | 720      | 72       |
| <b>Face</b>           | 5,409      | 320,133 | 7.7  | 343,164  | 298,657  | 11              | 943    | 1.3  | 1,733    | 507      | 20          | 835    | 1.7  | 1,364    | 509      |
| <b>Cervical Spine</b> | 235        | 11,995  | 0.3  | 14,974   | 9,567    | 0               | 0      | 0.0  | 0        | 0        | 1           | 9      | 0.0  | 62       | 0        |
| <b>Upper Trunk</b>    | 1,136      | 76,083  | 1.8  | 83,607   | 69,465   | 9               | 661    | 0.9  | 1,345    | 324      | 13          | 663    | 1.4  | 1,306    | 336      |
| <b>Lower Trunk</b>    | 989        | 51,066  | 1.2  | 59,066   | 44,091   | 12              | 550    | 0.8  | 1,183    | 254      | 21          | 1,066  | 2.2  | 1,810    | 624      |
| <b>Shoulder</b>       | 5,486      | 303,402 | 7.3  | 325,694  | 282,435  | 27              | 1,449  | 2.1  | 2,451    | 852      | 35          | 1,709  | 3.6  | 2,842    | 1,018    |
| <b>Humerus</b>        | 1,465      | 72,319  | 1.7  | 84,855   | 61,562   | 23              | 1,399  | 2.0  | 2,106    | 930      | 36          | 1,686  | 3.5  | 2,468    | 1,143    |
| <b>Elbow</b>          | 3,008      | 153,087 | 3.7  | 170,126  | 137,682  | 96              | 4,961  | 7.0  | 6,212    | 3,944    | 83          | 3,384  | 7.0  | 4,456    | 2,554    |
| <b>Forearm</b>        | 10,597     | 512,802 | 12.3 | 634,334  | 411,797  | 473             | 24,686 | 35.1 | 30,482   | 19,453   | 162         | 7,659  | 16.0 | 10,933   | 5,229    |
| <b>Wrist</b>          | 10,016     | 550,617 | 13.2 | 629,758  | 480,014  | 400             | 22,493 | 31.9 | 28,588   | 17,164   | 310         | 14,905 | 31.0 | 18,643   | 11,619   |
| <b>Hand</b>           | 4,814      | 263,198 | 6.3  | 281,603  | 245,830  | 29              | 1,778  | 2.5  | 2,655    | 1,183    | 15          | 790    | 1.6  | 1,512    | 408      |
| <b>Finger</b>         | 14,994     | 774,106 | 18.6 | 858,534  | 696,311  | 50              | 3,192  | 4.5  | 4,423    | 2,289    | 37          | 1,137  | 2.4  | 2,002    | 639      |
| <b>Pubic</b>          | 12         | 441     | 0.0  | 832      | 416      | 0               | 0      | 0.0  | 0        | 0        | 0           | 0      | 0.0  | 0        | 0        |
| <b>Hip/Femur</b>      | 715        | 28,392  | 0.7  | 34,940   | 23,294   | 4               | 192    | 0.3  | 845      | 42       | 5           | 180    | 0.4  | 768      | 43       |
| <b>Knee</b>           | 910        | 43,926  | 1.1  | 50,331   | 38,684   | 6               | 465    | 0.7  | 1,035    | 204      | 11          | 619    | 1.3  | 1,397    | 269      |
| <b>Tib/Fib</b>        | 5,521      | 277,634 | 6.7  | 326,110  | 235,847  | 84              | 3,802  | 5.4  | 4,916    | 2,930    | 164         | 6,996  | 14.6 | 8,628    | 5,632    |
| <b>Ankle</b>          | 7,398      | 391,177 | 9.4  | 440,498  | 346,908  | 73              | 3,571  | 5.1  | 4,353    | 2,923    | 131         | 5,386  | 11.2 | 6,458    | 4,475    |
| <b>Foot</b>           | 3,871      | 218,228 | 5.2  | 242,919  | 195,916  | 4               | 218    | 0.3  | 725      | 63       | 12          | 753    | 1.6  | 1,383    | 408      |
| <b>Toe</b>            | 1,797      | 99,502  | 2.4  | 113,556  | 87,351   | 1               | 21     | 0.0  | 162      | 0        | 1           | 11     | 0.0  | 82       | 0        |

| Fractures             | Skateboard |        |      |             |             | Toboggan/sledding |       |      |             |             | Gymnastics |        |      |             |             |
|-----------------------|------------|--------|------|-------------|-------------|-------------------|-------|------|-------------|-------------|------------|--------|------|-------------|-------------|
|                       | n          | N      | %    | U 95%<br>CL | L 95%<br>CL | n                 | N     | %    | U 95%<br>CL | L 95%<br>CL | n          | N      | %    | U 95%<br>CL | L 95%<br>CL |
| <b>Head</b>           | 76         | 3,463  | 0.9  | 5,219       | 2,279       | 17                | 713   | 1.0  | 1,343       | 380         | 7          | 187    | 0.1  | 631         | 53          |
| <b>Face</b>           | 110        | 7,007  | 1.9  | 9,078       | 5,403       | 49                | 2,954 | 4.0  | 4,021       | 2,160       | 159        | 10,300 | 5.9  | 12,325      | 8,591       |
| <b>Cervical Spine</b> | 2          | 112    | 0.0  | 588         | 37          | 8                 | 490   | 0.7  | 1,131       | 212         | 11         | 658    | 0.4  | 1,525       | 281         |
| <b>Upper Trunk</b>    | 37         | 2,379  | 0.6  | 3,786       | 1,507       | 46                | 3,289 | 4.5  | 5,766       | 1,846       | 35         | 2,434  | 1.4  | 3,612       | 1,630       |
| <b>Lower Trunk</b>    | 48         | 2,929  | 0.8  | 3,969       | 2,168       | 80                | 5,639 | 7.7  | 7,590       | 4,153       | 93         | 5,980  | 3.4  | 8,030       | 4,436       |
| <b>Shoulder</b>       | 378        | 26,118 | 7.1  | 31,644      | 21,464      | 147               | 8,849 | 12.1 | 11,480      | 6,751       | 104        | 5,538  | 3.2  | 6,504       | 4,716       |
| <b>Humerus</b>        | 127        | 6,900  | 1.9  | 9,409       | 5,035       | 31                | 1,665 | 2.3  | 2,671       | 1,029       | 147        | 6,238  | 3.6  | 7,749       | 5,014       |
| <b>Elbow</b>          | 466        | 29,142 | 7.9  | 32,012      | 26,499      | 24                | 1,169 | 1.6  | 2,204       | 620         | 327        | 14,178 | 8.1  | 16,901      | 11,869      |
| <b>Forearm</b>        | 1,394      | 76,153 | 20.7 | 96,587      | 59,099      | 131               | 8,503 | 11.7 | 11,232      | 6,371       | 654        | 25,222 | 14.4 | 31,628      | 19,934      |
| <b>Wrist</b>          | 1,244      | 79,434 | 21.6 | 99,858      | 62,223      | 146               | 8,345 | 11.4 | 10,984      | 6,277       | 377        | 22,549 | 12.9 | 27,788      | 18,181      |
| <b>Hand</b>           | 295        | 19,747 | 5.4  | 22,346      | 17,458      | 42                | 2,681 | 3.7  | 4,124       | 1,730       | 140        | 6,897  | 3.9  | 9,309       | 5,084       |
| <b>Finger</b>         | 261        | 16,473 | 4.5  | 19,847      | 13,635      | 81                | 5,937 | 8.1  | 8,065       | 4,335       | 354        | 16,891 | 9.6  | 20,565      | 13,815      |
| <b>Pubic</b>          | 2          | 45     | 0.0  | 331         | 0           | 0                 | 0     | 0.0  | 0           | 0           | 0          | 0      | 0.0  | 0           | 0           |
| <b>Hip/Femur</b>      | 44         | 2,301  | 0.6  | 3,455       | 1,544       | 50                | 2,138 | 2.9  | 3,036       | 1,496       | 20         | 735    | 0.4  | 1,420       | 386         |
| <b>Knee</b>           | 44         | 3,264  | 0.9  | 4,925       | 2,168       | 10                | 526   | 0.7  | 1,124       | 248         | 34         | 1,934  | 1.1  | 3,033       | 1,227       |
| <b>Tib/Fib</b>        | 435        | 26,506 | 7.2  | 34,180      | 20,435      | 178               | 8,893 | 12.2 | 10,940      | 7,189       | 173        | 7,060  | 4.0  | 9,047       | 5,505       |
| <b>Ankle</b>          | 569        | 35,496 | 9.7  | 41,604      | 30,174      | 151               | 7,952 | 10.9 | 11,312      | 5,503       | 368        | 19,117 | 10.9 | 23,037      | 15,796      |
| <b>Foot</b>           | 381        | 26,136 | 7.1  | 33,886      | 20,030      | 51                | 2,897 | 4.0  | 3,861       | 2,168       | 387        | 21,054 | 12.0 | 24,124      | 18,338      |
| <b>Toe</b>            | 63         | 3,925  | 1.1  | 5,733       | 2,683       | 4                 | 342   | 0.5  | 1,409       | 80          | 167        | 8,349  | 4.8  | 10,116      | 6,873       |

| Fractures             | Basketball |         |      |          |          | Baseball |        |      |          |          | Softball |        |      |          |          |
|-----------------------|------------|---------|------|----------|----------|----------|--------|------|----------|----------|----------|--------|------|----------|----------|
|                       | n          | N       | %    | U 95% CL | L 95% CL | n        | N      | %    | U 95% CL | L 95% CL | n        | N      | %    | U 95% CL | L 95% CL |
| <b>Head</b>           | 28         | 986     | 0.1  | 1,838    | 560      | 40       | 1,906  | 0.7  | 2,853    | 1,286    | 6        | 331    | 0.2  | 999      | 115      |
| <b>Face</b>           | 1,208      | 67,960  | 8.5  | 77,373   | 59,628   | 1,379    | 78,634 | 28.1 | 84,962   | 72,601   | 658      | 43,149 | 26.3 | 47,022   | 39,485   |
| <b>Cervical Spine</b> | 5          | 236     | 0.0  | 799      | 80       | 3        | 70     | 0.0  | 308      | 28       | 3        | 122    | 0.1  | 573      | 33       |
| <b>Upper Trunk</b>    | 95         | 5,846   | 0.7  | 7,593    | 4,476    | 43       | 3,420  | 1.2  | 5,425    | 2,153    | 45       | 3,287  | 2.0  | 4,735    | 2,277    |
| <b>Lower Trunk</b>    | 91         | 3,091   | 0.4  | 4,316    | 2,238    | 47       | 2,162  | 0.8  | 2,797    | 1,678    | 9        | 612    | 0.4  | 1,671    | 229      |
| <b>Shoulder</b>       | 310        | 15,927  | 2.0  | 19,103   | 13,268   | 139      | 8,802  | 3.1  | 10,515   | 7,355    | 70       | 3,880  | 2.4  | 5,226    | 2,867    |
| <b>Humerus</b>        | 119        | 5,051   | 0.6  | 6,714    | 3,837    | 76       | 4,057  | 1.5  | 6,544    | 2,517    | 16       | 723    | 0.4  | 1,311    | 393      |
| <b>Elbow</b>          | 443        | 20,887  | 2.6  | 25,098   | 17,345   | 167      | 8,631  | 3.1  | 11,578   | 6,404    | 55       | 3,344  | 2.0  | 4,538    | 2,458    |
| <b>Forearm</b>        | 1,432      | 64,270  | 8.0  | 79,371   | 51,875   | 408      | 20,136 | 7.2  | 24,638   | 16,388   | 149      | 8,468  | 5.2  | 11,403   | 6,259    |
| <b>Wrist</b>          | 1,510      | 75,388  | 9.4  | 84,567   | 67,142   | 377      | 22,964 | 8.2  | 27,631   | 19,045   | 170      | 11,242 | 6.9  | 13,664   | 9,224    |
| <b>Hand</b>           | 1,210      | 59,420  | 7.4  | 65,623   | 53,793   | 352      | 21,108 | 7.5  | 24,387   | 18,234   | 182      | 10,665 | 6.5  | 12,943   | 8,765    |
| <b>Finger</b>         | 4,955      | 237,939 | 29.8 | 259,135  | 217,811  | 1,086    | 62,577 | 22.4 | 68,014   | 57,443   | 696      | 42,249 | 25.8 | 46,219   | 38,519   |
| <b>Pubic</b>          | 0          | 0       | 0.0  | 0        | 0        | 1        | 21     | 0.0  | 140      | 0        | 0        | 0      | 0.0  | 0        | 0        |
| <b>Hip/Femur</b>      | 53         | 2,216   | 0.3  | 2,957    | 1,679    | 24       | 982    | 0.4  | 1,790    | 531      | 5        | 307    | 0.2  | 786      | 115      |
| <b>Knee</b>           | 248        | 10,545  | 1.3  | 12,789   | 8,712    | 32       | 1,565  | 0.6  | 2,489    | 979      | 24       | 1,503  | 0.9  | 2,589    | 868      |
| <b>Tib/Fib</b>        | 963        | 43,754  | 5.5  | 54,353   | 35,170   | 255      | 13,185 | 4.7  | 17,339   | 9,984    | 191      | 10,692 | 6.5  | 13,582   | 8,389    |
| <b>Ankle</b>          | 2,121      | 108,705 | 13.6 | 122,694  | 96,077   | 373      | 22,038 | 7.9  | 25,813   | 18,765   | 293      | 17,538 | 10.7 | 20,742   | 14,778   |
| <b>Foot</b>           | 1,191      | 63,848  | 8.0  | 72,177   | 56,431   | 104      | 5,653  | 2.0  | 7,383    | 4,335    | 67       | 4,113  | 2.5  | 5,669    | 2,965    |
| <b>Toe</b>            | 260        | 13,238  | 1.7  | 15,826   | 11,030   | 31       | 1,752  | 0.6  | 2,825    | 1,091    | 24       | 1,614  | 1.0  | 3,162    | 819      |

| Fractures      | Hockey |        |      |          |          | Football |         |      |          |          | Soccer |        |      |          |          |
|----------------|--------|--------|------|----------|----------|----------|---------|------|----------|----------|--------|--------|------|----------|----------|
|                | n      | N      | %    | U 95% CL | L 95% CL | n        | N       | %    | U 95% CL | L 95% CL | n      | N      | %    | U 95% CL | L 95% CL |
| Head           | 0      | 0      | 0.0  | 0        | 0        | 18       | 625     | 0.1  | 1,309    | 281      | 9      | 417    | 0.1  | 1,101    | 176      |
| Face           | 119    | 7,225  | 7.5  | 8,979    | 5,786    | 592      | 32,940  | 3.5  | 38,062   | 28,523   | 510    | 28,811 | 6.5  | 32,768   | 25,280   |
| Cervical Spine | 5      | 276    | 0.3  | 726      | 106      | 50       | 1,515   | 0.2  | 2,525    | 935      | 7      | 590    | 0.1  | 1,321    | 264      |
| Upper Trunk    | 52     | 3,139  | 3.2  | 4,257    | 2,313    | 256      | 16,305  | 1.7  | 18,797   | 14,121   | 98     | 5,258  | 1.2  | 7,091    | 3,920    |
| Lower Trunk    | 14     | 970    | 1.0  | 1,916    | 484      | 166      | 6,323   | 0.7  | 8,510    | 4,676    | 113    | 4,820  | 1.1  | 6,122    | 3,788    |
| Shoulder       | 286    | 13,442 | 13.9 | 15,888   | 11,321   | 2,299    | 113,737 | 12.2 | 123,256  | 104,926  | 680    | 35,655 | 8.1  | 39,550   | 32,107   |
| Humerus        | 40     | 1,556  | 1.6  | 2,680    | 900      | 446      | 20,307  | 2.2  | 24,127   | 17,114   | 100    | 4,919  | 1.1  | 6,474    | 3,744    |
| Elbow          | 39     | 2,253  | 2.3  | 3,241    | 1,558    | 555      | 27,570  | 2.9  | 31,141   | 24,408   | 279    | 11,909 | 2.7  | 14,094   | 10,042   |
| Forearm        | 273    | 12,421 | 12.8 | 19,043   | 7,867    | 2,671    | 112,423 | 12.0 | 136,722  | 91,928   | 1,363  | 62,914 | 14.3 | 83,857   | 46,509   |
| Wrist          | 291    | 12,277 | 12.7 | 17,369   | 8,515    | 1,930    | 97,226  | 10.4 | 113,436  | 83,043   | 1,489  | 74,671 | 17.0 | 88,746   | 62,408   |
| Hand           | 154    | 8,912  | 9.2  | 11,360   | 6,947    | 1,280    | 64,138  | 6.9  | 69,016   | 59,571   | 269    | 13,966 | 3.2  | 17,221   | 11,319   |
| Finger         | 239    | 14,186 | 14.7 | 18,317   | 10,857   | 5,095    | 254,563 | 27.2 | 278,588  | 231,829  | 973    | 47,752 | 10.8 | 53,512   | 42,545   |
| Pubic          | 1      | 8      | 0.0  | 58       | 0        | 1        | 21      | 0.0  | 187      | 0        | 4      | 63     | 0.0  | 176      | 44       |
| Hip/Femur      | 16     | 445    | 0.5  | 919      | 213      | 277      | 9,284   | 1.0  | 12,064   | 7,107    | 59     | 1,795  | 0.4  | 3,039    | 1,057    |
| Knee           | 15     | 938    | 1.0  | 2,264    | 387      | 233      | 9,185   | 1.0  | 11,035   | 7,668    | 112    | 5,108  | 1.2  | 6,562    | 3,964    |
| Tib/Fib        | 128    | 7,275  | 7.5  | 10,121   | 5,177    | 1,329    | 58,431  | 6.2  | 69,483   | 49,097   | 860    | 42,279 | 9.6  | 47,786   | 37,348   |
| Ankle          | 158    | 8,492  | 8.8  | 11,118   | 6,435    | 1,358    | 64,099  | 6.9  | 73,972   | 55,456   | 1,025  | 51,332 | 11.7 | 58,533   | 44,879   |
| Foot           | 35     | 2,071  | 2.1  | 3,600    | 1,180    | 616      | 30,813  | 3.3  | 34,601   | 27,401   | 435    | 24,811 | 5.6  | 28,143   | 21,845   |
| Toe            | 14     | 875    | 0.9  | 1,848    | 416      | 318      | 15,668  | 1.7  | 18,797   | 13,092   | 426    | 23,354 | 5.3  | 27,394   | 19,863   |

| Fractures      | Racquet Sports |       |      |          |          | Volleyball |        |      |          |          | Track/Field |       |      |          |          |
|----------------|----------------|-------|------|----------|----------|------------|--------|------|----------|----------|-------------|-------|------|----------|----------|
|                | n              | N     | %    | U 95% CL | L 95% CL | n          | N      | %    | U 95% CL | L 95% CL | n           | N     | %    | U 95% CL | L 95% CL |
| Head           | 7              | 227   | 0.6  | 767      | 67       | 2          | 245    | 0.3  | 860      | 68       | 2           | 147   | 0.5  | 785      | 27       |
| Face           | 24             | 1,573 | 4.5  | 2,315    | 1,060    | 32         | 2,260  | 3.0  | 3,600    | 1,411    | 20          | 1,471 | 5.0  | 2,455    | 868      |
| Cervical Spine | 1              | 21    | 0.1  | 159      | 4        | 2          | 216    | 0.3  | 792      | 60       | 0           | 0     | 0.0  | 0        | 0        |
| Upper Trunk    | 17             | 1,092 | 3.1  | 1,810    | 654      | 11         | 876    | 1.2  | 1,743    | 438      | 3           | 68    | 0.2  | 198      | 24       |
| Lower Trunk    | 18             | 1,098 | 3.1  | 2,022    | 587      | 9          | 750    | 1.0  | 1,524    | 370      | 72          | 2,380 | 8.1  | 3,305    | 1,697    |
| Shoulder       | 20             | 1,008 | 2.9  | 1,810    | 555      | 20         | 1,063  | 1.4  | 1,826    | 619      | 45          | 2,249 | 7.6  | 3,049    | 1,647    |
| Humerus        | 14             | 1,108 | 3.1  | 2,923    | 406      | 4          | 165    | 0.2  | 785      | 38       | 7           | 552   | 1.9  | 1,561    | 192      |
| Elbow          | 35             | 2,001 | 5.7  | 2,633    | 1,513    | 35         | 1,668  | 2.2  | 2,543    | 1,087    | 39          | 2,142 | 7.3  | 3,417    | 1,319    |
| Forearm        | 84             | 4,344 | 12.3 | 6,669    | 2,750    | 106        | 6,666  | 8.8  | 9,547    | 4,596    | 97          | 4,482 | 15.2 | 5,970    | 3,311    |
| Wrist          | 137            | 7,265 | 20.6 | 8,730    | 5,991    | 132        | 8,171  | 10.8 | 10,716   | 6,173    | 64          | 3,380 | 11.5 | 4,545    | 2,485    |
| Hand           | 27             | 1,771 | 5.0  | 2,760    | 1,124    | 63         | 3,902  | 5.2  | 5,215    | 2,905    | 19          | 986   | 3.3  | 1,679    | 573      |
| Finger         | 51             | 2,707 | 7.7  | 3,782    | 1,919    | 400        | 23,389 | 31.0 | 26,912   | 20,135   | 20          | 769   | 2.6  | 1,293    | 454      |
| Pubic          | 0              | 0     | 0.0  | 0        | 0        | 0          | 0      | 0.0  | 0        | 0        | 0           | 0     | 0.0  | 0        | 0        |
| Hip/Femur      | 1              | 24    | 0.1  | 170      | 4        | 5          | 151    | 0.2  | 664      | 30       | 13          | 568   | 1.9  | 1,095    | 292      |
| Knee           | 9              | 561   | 1.6  | 1,021    | 307      | 16         | 915    | 1.2  | 1,758    | 475      | 17          | 482   | 1.6  | 1,045    | 221      |
| Tib/Fib        | 30             | 1,753 | 5.0  | 2,916    | 1,039    | 61         | 4,539  | 6.0  | 6,845    | 2,981    | 63          | 2,896 | 9.8  | 4,309    | 1,912    |
| Ankle          | 81             | 5,261 | 14.9 | 7,305    | 3,715    | 178        | 10,952 | 14.5 | 13,146   | 9,071    | 52          | 3,098 | 10.5 | 4,861    | 1,924    |
| Foot           | 52             | 2,739 | 7.7  | 3,548    | 2,103    | 106        | 6,704  | 8.9  | 9,411    | 4,717    | 62          | 3,146 | 10.7 | 4,238    | 2,311    |
| Toe            | 12             | 791   | 2.2  | 1,753    | 353      | 41         | 2,834  | 3.8  | 4,407    | 1,811    | 12          | 698   | 2.4  | 1,482    | 325      |

| Fractures             | Combative |        |      |          |          | Swimming |        |      |          |          | Waterski/Surfboarding |       |      |          |          |
|-----------------------|-----------|--------|------|----------|----------|----------|--------|------|----------|----------|-----------------------|-------|------|----------|----------|
|                       | n         | N      | %    | U 95% CL | L 95% CL | n        | N      | %    | U 95% CL | L 95% CL | n                     | N     | %    | U 95% CI | L 95% CI |
| <b>Head</b>           | 5         | 86     | 0.1  | 224      | 34       | 21       | 885    | 0.9  | 1,919    | 404      | 7                     | 613   | 1.7  | 1,150    | 326      |
| <b>Face</b>           | 274       | 17,043 | 9.9  | 19,600   | 14,786   | 136      | 8,441  | 9.0  | 10,280   | 6,903    | 62                    | 5,775 | 16.1 | 7,700    | 4,258    |
| <b>Cervical Spine</b> | 4         | 50     | 0.0  | 172      | 17       | 101      | 5,457  | 5.8  | 7,091    | 4,176    | 15                    | 1,137 | 3.2  | 2,242    | 566      |
| <b>Upper Trunk</b>    | 108       | 8,423  | 4.9  | 10,384   | 6,826    | 92       | 5,853  | 6.2  | 7,703    | 4,420    | 39                    | 3,279 | 9.2  | 4,777    | 2,217    |
| <b>Lower Trunk</b>    | 16        | 935    | 0.5  | 2,269    | 378      | 48       | 2,773  | 2.9  | 4,326    | 1,768    | 14                    | 942   | 2.6  | 2,303    | 376      |
| <b>Shoulder</b>       | 240       | 14,361 | 8.4  | 16,625   | 12,379   | 50       | 3,226  | 3.4  | 4,637    | 2,238    | 25                    | 2,668 | 7.4  | 4,763    | 1,450    |
| <b>Humerus</b>        | 74        | 2,922  | 1.7  | 4,315    | 1,977    | 40       | 2,513  | 2.7  | 3,753    | 1,674    | 9                     | 634   | 1.8  | 1,168    | 344      |
| <b>Elbow</b>          | 160       | 7,669  | 4.5  | 9,318    | 6,293    | 66       | 3,536  | 3.8  | 4,994    | 2,492    | 11                    | 896   | 2.5  | 1,995    | 394      |
| <b>Forearm</b>        | 265       | 13,859 | 8.1  | 18,138   | 10,522   | 112      | 5,125  | 5.4  | 7,016    | 3,724    | 37                    | 2,508 | 7.0  | 3,323    | 1,880    |
| <b>Wrist</b>          | 242       | 14,198 | 8.3  | 16,797   | 11,966   | 80       | 4,938  | 5.3  | 6,442    | 3,771    | 22                    | 2,061 | 5.8  | 3,768    | 1,099    |
| <b>Hand</b>           | 571       | 35,878 | 20.9 | 40,884   | 31,342   | 60       | 3,024  | 3.2  | 4,251    | 2,144    | 15                    | 1,353 | 3.8  | 2,274    | 795      |
| <b>Finger</b>         | 391       | 24,280 | 14.1 | 28,540   | 20,562   | 115      | 7,617  | 8.1  | 9,565    | 6,038    | 32                    | 2,525 | 7.1  | 3,753    | 1,676    |
| <b>Pubic</b>          | 0         | 0      | 0.0  | 0        | 0        | 0        | 0      | 0.0  | 0        | 0        | 1                     | 127   | 0.4  | 455      | 36       |
| <b>Hip/Femur</b>      | 12        | 510    | 0.3  | 1,221    | 206      | 29       | 1,517  | 1.6  | 2,426    | 950      | 16                    | 870   | 2.4  | 1,891    | 394      |
| <b>Knee</b>           | 16        | 904    | 0.5  | 1,685    | 481      | 18       | 1,053  | 1.1  | 1,947    | 564      | 5                     | 281   | 0.8  | 1,074    | 72       |
| <b>Tib/Fib</b>        | 121       | 6,338  | 3.7  | 8,356    | 4,797    | 106      | 5,657  | 6.0  | 7,571    | 4,204    | 42                    | 3,754 | 10.5 | 5,565    | 2,485    |
| <b>Ankle</b>          | 150       | 7,287  | 4.2  | 11,003   | 4,780    | 114      | 7,011  | 7.5  | 8,850    | 5,530    | 34                    | 2,514 | 7.0  | 4,255    | 1,454    |
| <b>Foot</b>           | 123       | 6,752  | 3.9  | 8,596    | 5,295    | 195      | 12,318 | 13.1 | 14,634   | 10,317   | 20                    | 1,995 | 5.6  | 3,535    | 1,103    |
| <b>Toe</b>            | 184       | 10,432 | 6.1  | 12,396   | 8,768    | 213      | 13,106 | 13.9 | 15,556   | 10,985   | 20                    | 1,882 | 5.3  | 2,718    | 1,293    |

| Fractures      | Snow Skiing |        |      |          |          |
|----------------|-------------|--------|------|----------|----------|
|                | n           | N      | %    | U 95% CL | L 95% CL |
| Head           | 7           | 352    | 0.1  | 724      | 161      |
| Face           | 46          | 2,813  | 1.0  | 4,154    | 1,903    |
| Cervical Spine | 17          | 1,036  | 0.4  | 1,769    | 616      |
| Upper Trunk    | 137         | 9,813  | 3.7  | 13,052   | 7,344    |
| Lower Trunk    | 118         | 8,047  | 3.0  | 10,452   | 6,191    |
| Shoulder       | 611         | 43,724 | 16.3 | 48,644   | 39,210   |
| Humerus        | 156         | 9,925  | 3.7  | 12,195   | 8,067    |
| Elbow          | 128         | 7,745  | 2.9  | 9,809    | 6,111    |
| Forearm        | 786         | 52,964 | 19.8 | 66,681   | 41,488   |
| Wrist          | 1,095       | 69,109 | 25.8 | 84,477   | 55,693   |
| Hand           | 91          | 6,183  | 2.3  | 7,826    | 4,878    |
| Finger         | 158         | 9,925  | 3.7  | 12,463   | 7,880    |
| Pubic          | 2           | 156    | 0.1  | 536      | 54       |
| Hip/Femur      | 82          | 4,176  | 1.6  | 5,360    | 3,243    |
| Knee           | 60          | 4,077  | 1.5  | 6,673    | 2,493    |
| Tib/Fib        | 338         | 23,822 | 8.9  | 36,047   | 15,464   |
| Ankle          | 169         | 11,327 | 4.2  | 15,143   | 8,442    |
| Foot           | 30          | 2,206  | 0.8  | 3,591    | 1,340    |
| Toe            | 6           | 610    | 0.2  | 1,983    | 188      |

# Skating Fractures

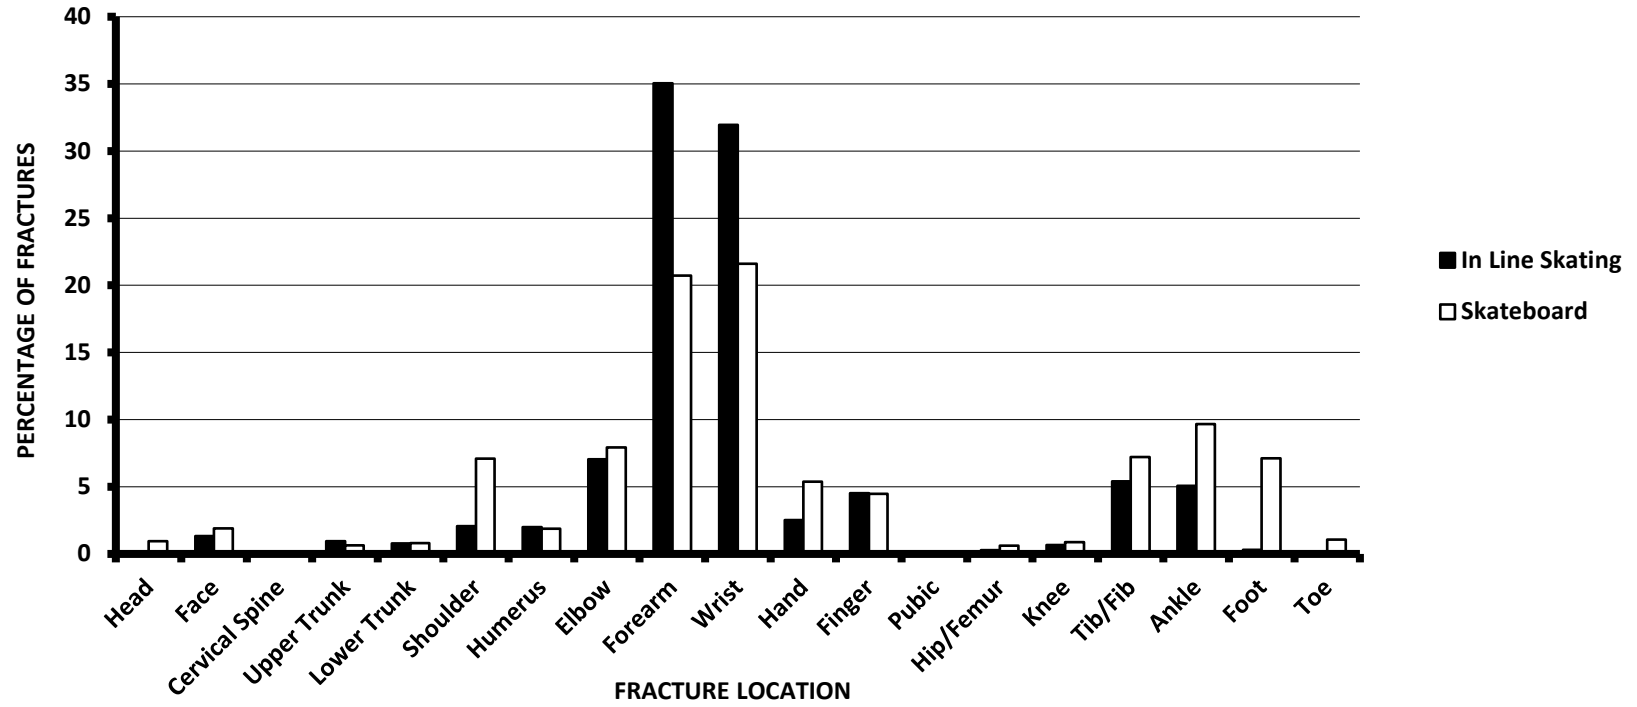



### Non-team sport fractures

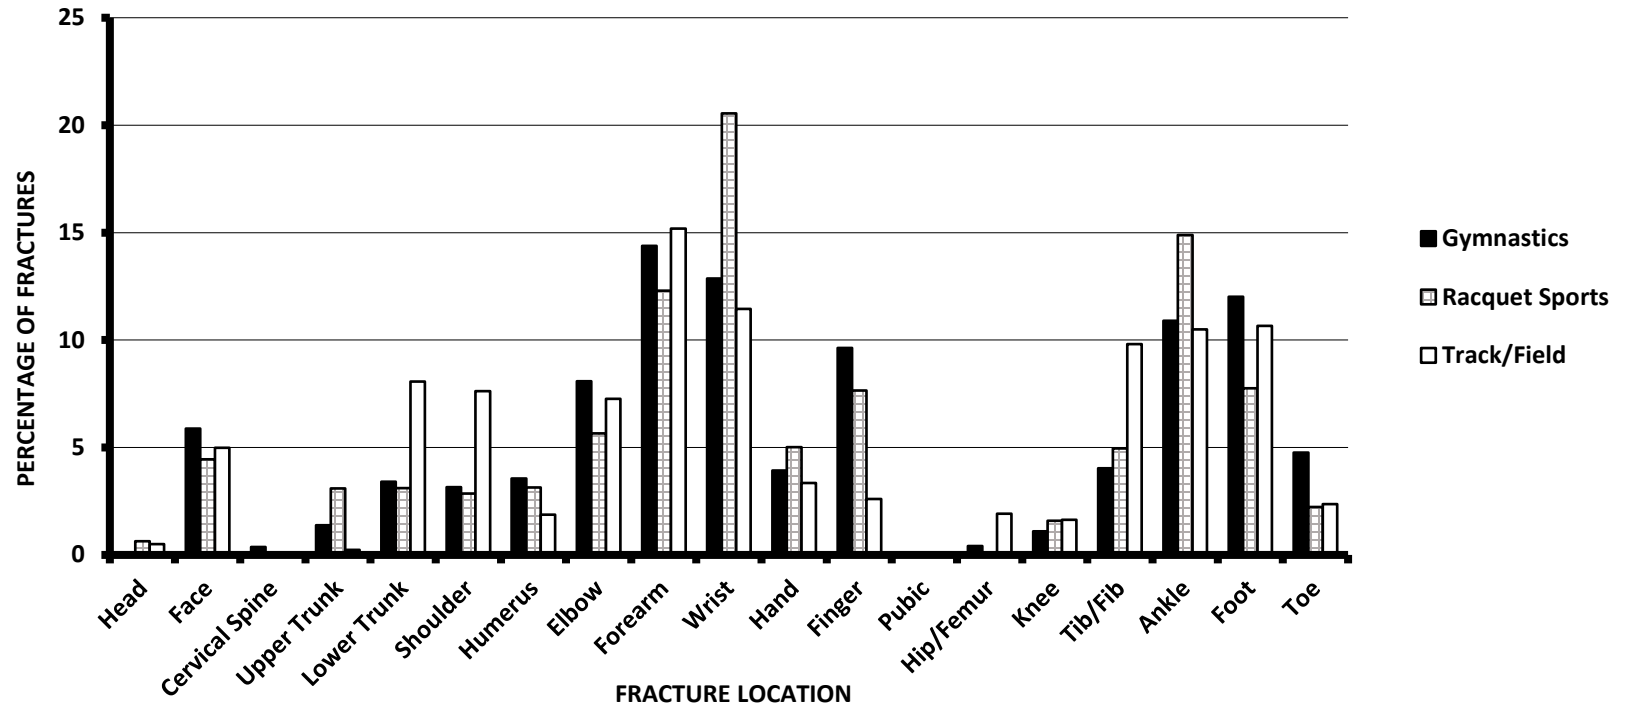

### Indoor contact sport fractures

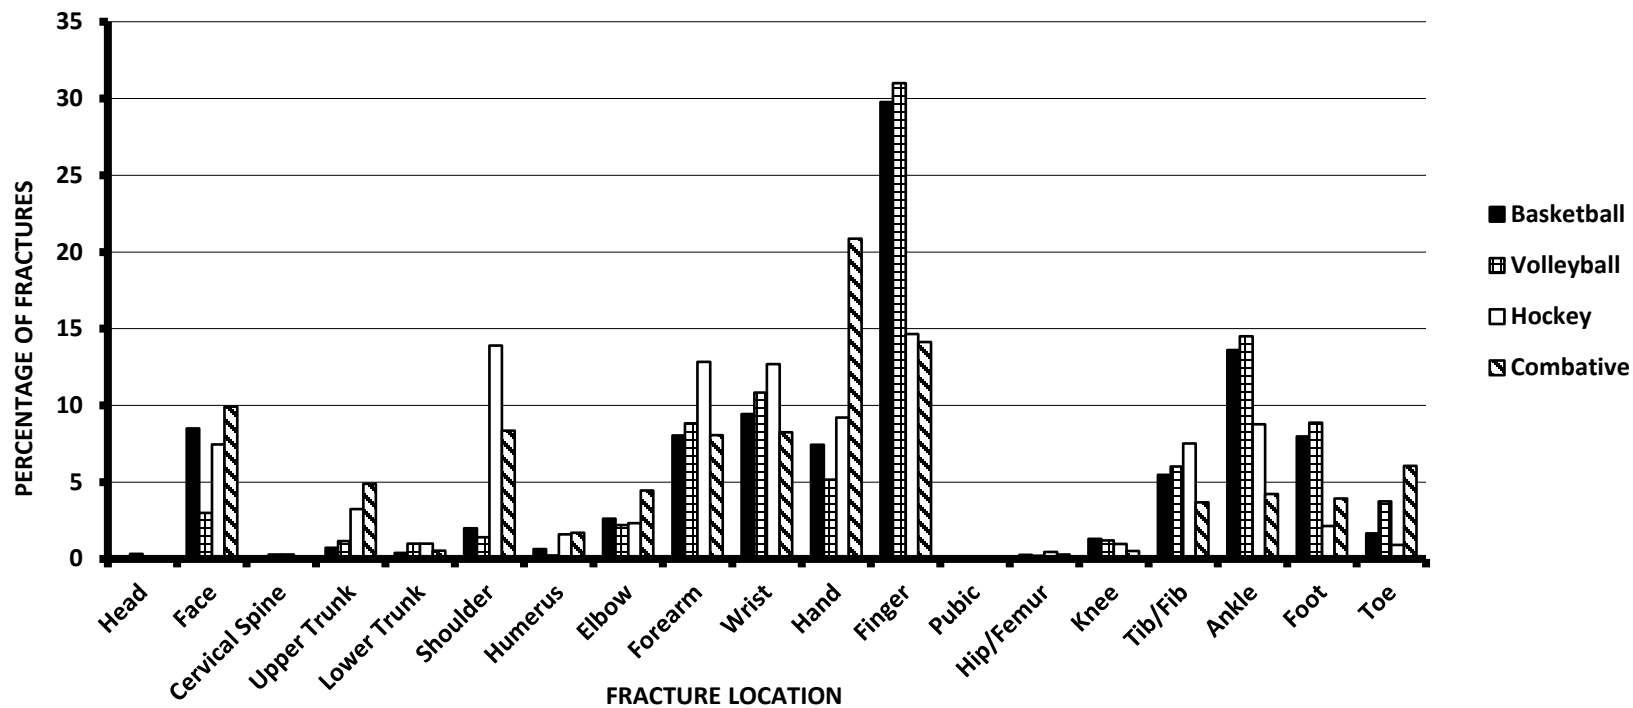

### Outdoor contact sport fractures

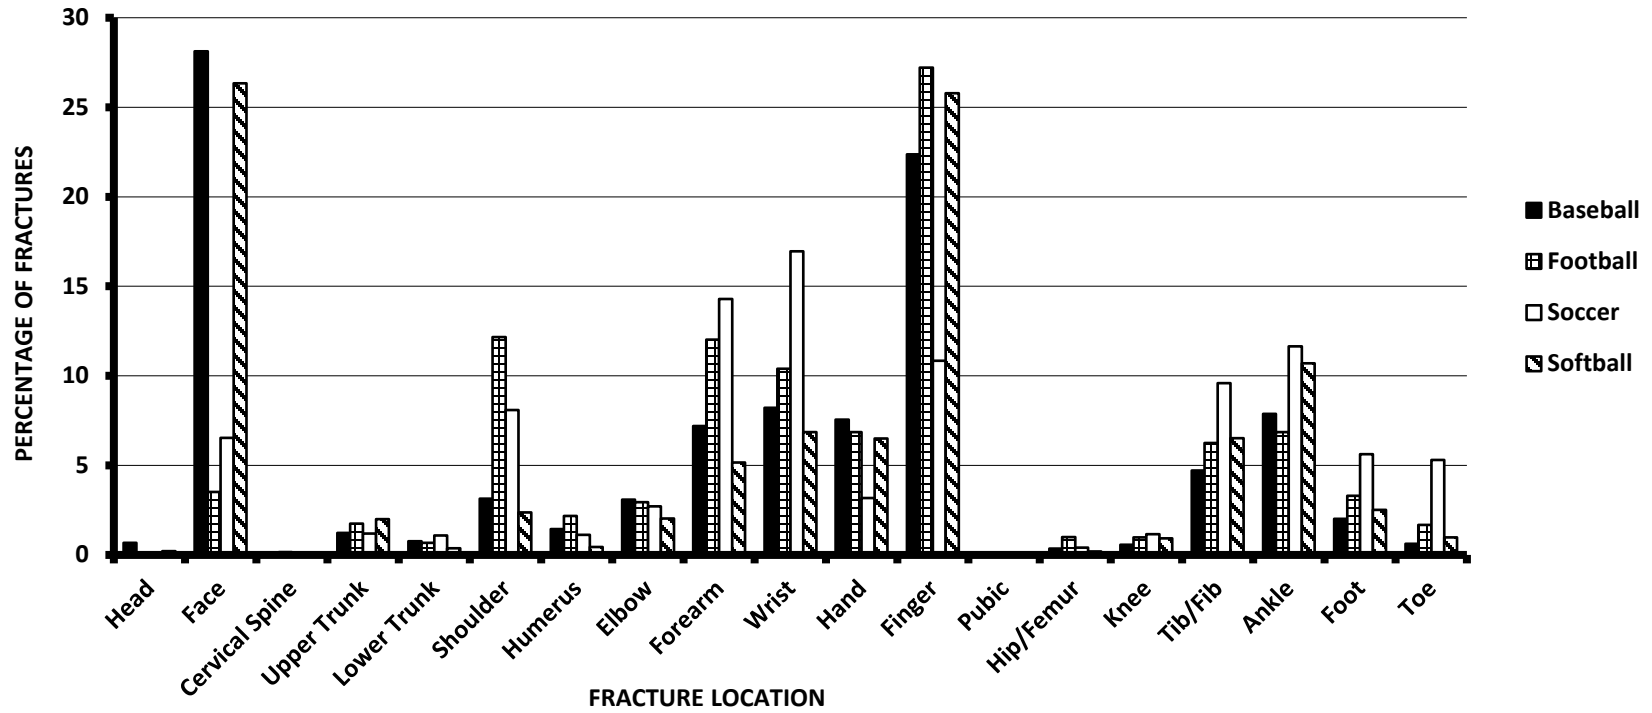

# Water sport fractures

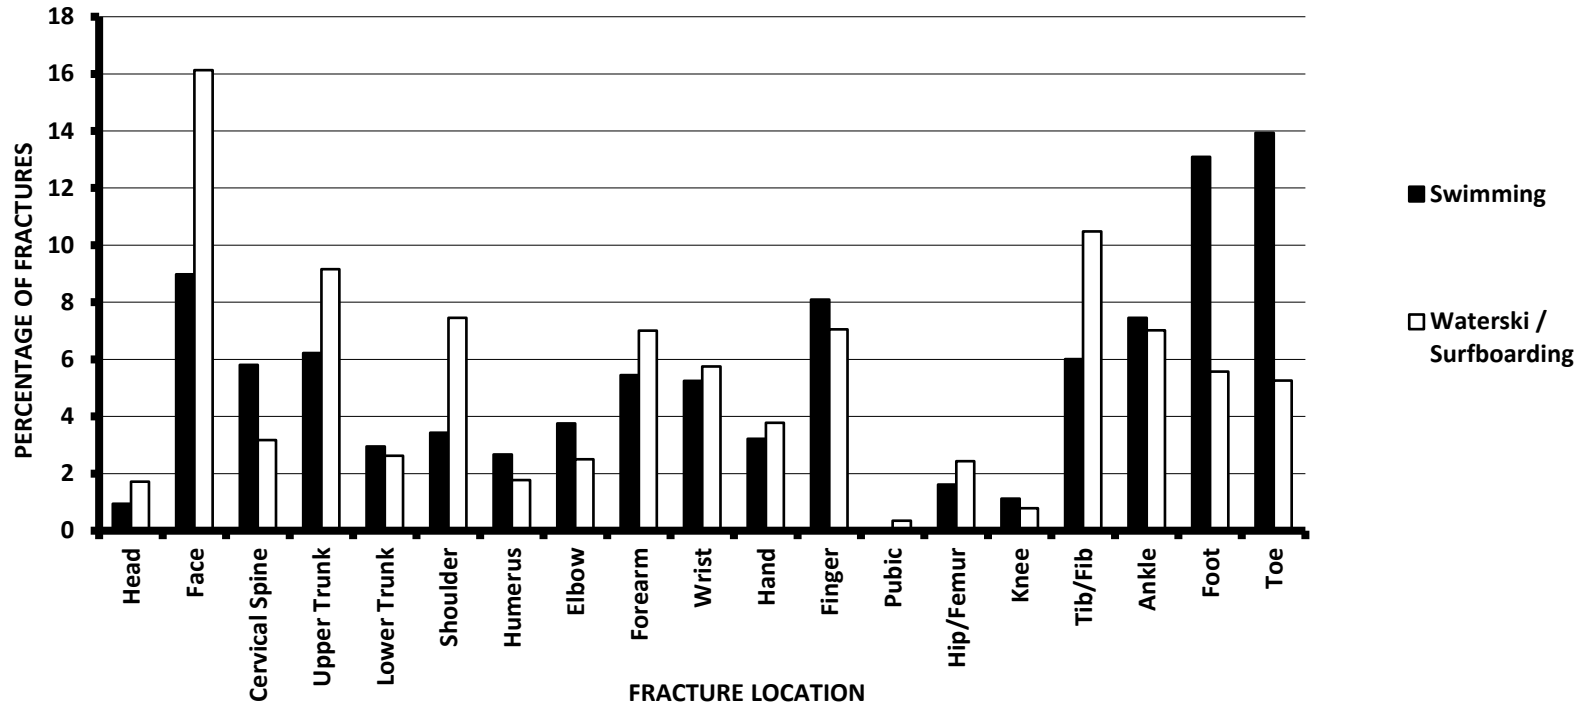

### Snow sport fractures

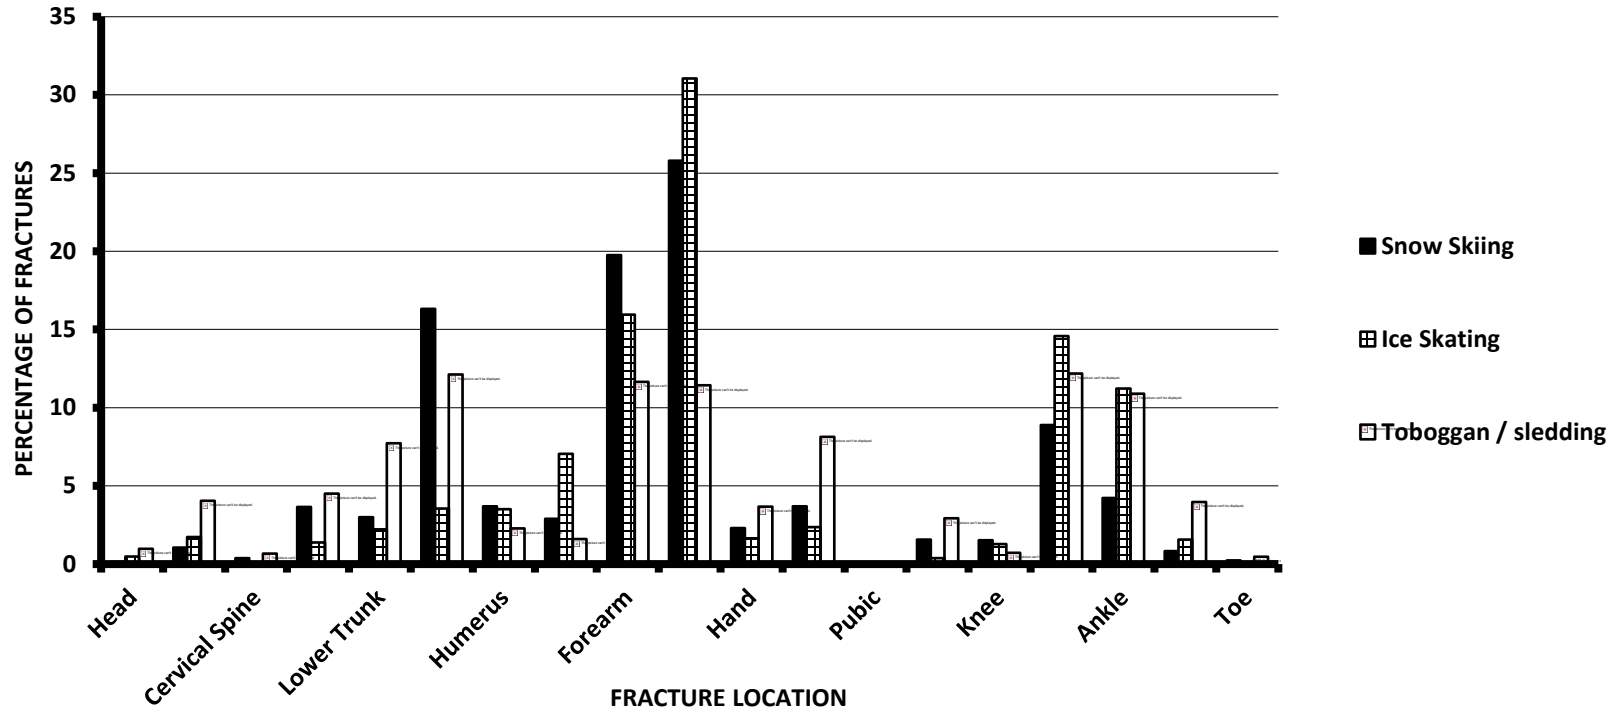

Supplement: 35113_Appendix_2_UPDATED.pdf [file 35113_Appendix_2_UPDATED.pdf]
