# Supplementary material
Source: PubMed Central journal article supplement (PMC7040946)
Supplement: 35113_Appendix_3_UPDATED.pdf [file 35113_Appendix_3_UPDATED.pdf]

### Appendix 3: Activity-Specific Dislocations by Location

| Dislocations | All Sports |         |      |           |           | In Line Skating |       |      |          |          | Ice Skating |       |      |          |          |
|--------------|------------|---------|------|-----------|-----------|-----------------|-------|------|----------|----------|-------------|-------|------|----------|----------|
|              | n          | N       | %    | U 95% CL  | L 95% CL  | n               | N     | %    | U 95% CL | L 95% CL | n           | N     | %    | U 95% CL | L 95% CL |
| Face         | 35         | 1,509   | 0.2  | 14,143    | 4,991     | 0               | 0     | 0.0  | 0        | 0        | 0           | 0     | 0.0  | 0        | 0        |
| Upper Trunk  | 7          | 510     | 0.1  | 8,319     | 832       | 0               | 0     | 0.0  | 0        | 0        | 0           | 0     | 0.0  | 0        | 0        |
| Lower Trunk  | 106        | 5,065   | 0.7  | 37,020    | 22,462    | 0               | 0     | 0.0  | 0        | 0        | 0           | 0     | 0.0  | 0        | 0        |
| Shoulder     | 4,673      | 283,113 | 38.7 | 1,750,761 | 1,471,654 | 17              | 1,556 | 47.4 | 46,477   | 20,749   | 36          | 1,847 | 51.3 | 32,255   | 16,896   |
| Humerus      | 9          | 288     | 0.0  | 4,576     | 416       | 0               | 0     | 0.0  | 0        | 0        | 0           | 0     | 0.0  | 0        | 0        |
| Elbow        | 945        | 47,793  | 6.5  | 306,976   | 240,007   | 14              | 889   | 27.1 | 33,799   | 9,149    | 6           | 330   | 9.2  | 10,040   | 1,781    |
| Forearm      | 23         | 1,565   | 0.2  | 16,222    | 4,991     | 0               | 0     | 0.0  | 0        | 0        | 1           | 125   | 3.5  | 10,078   | 230      |
| Wrist        | 43         | 2,653   | 0.4  | 22,046    | 10,399    | 0               | 0     | 0.0  | 0        | 0        | 2           | 29    | 0.8  | 1,988    | 77       |
| Hand         | 53         | 2,956   | 0.4  | 24,125    | 11,647    | 0               | 0     | 0.0  | 0        | 0        | 0           | 0     | 0.0  | 0        | 0        |
| Finger       | 3,504      | 195,245 | 26.7 | 1,242,878 | 985,817   | 4               | 321   | 9.8  | 12,938   | 3,500    | 6           | 333   | 9.3  | 9,353    | 1,973    |
| Hip/Femur    | 7          | 268     | 0.0  | 4,991     | 416       | 0               | 0     | 0.0  | 0        | 0        | 0           | 0     | 0.0  | 0        | 0        |
| Knee         | 2,666      | 168,202 | 23.0 | 1,135,977 | 796,973   | 8               | 389   | 11.8 | 17,741   | 3,585    | 21          | 935   | 26.0 | 19,575   | 7,293    |
| Ankle        | 181        | 10,510  | 1.4  | 78,200    | 45,339    | 1               | 129   | 3.9  | 11,684   | 585      | 0           | 0     | 0.0  | 0        | 0        |
| Foot         | 25         | 1,252   | 0.2  | 11,647    | 4,160     | 0               | 0     | 0.0  | 0        | 0        | 0           | 0     | 0.0  | 0        | 0        |
| Toe          | 184        | 10,926  | 1.5  | 79,448    | 48,251    | 0               | 0     | 0.0  | 0        | 0        | 0           | 0     | 0.0  | 0        | 0        |

| Dislocations | Skateboard |        |      |             |             | Toboggan/sledding |       |      |             |             | Gymnastics |        |      |             |             |
|--------------|------------|--------|------|-------------|-------------|-------------------|-------|------|-------------|-------------|------------|--------|------|-------------|-------------|
|              | n          | N      | %    | U 95%<br>CL | L 95%<br>CL | n                 | N     | %    | U 95%<br>CL | L 95%<br>CL | n          | N      | %    | U 95%<br>CL | L 95%<br>CL |
| Face         | 0          | 0      | 0.0  | 0           | 0           | 0                 | 0     | 0.0  | 0           | 0           | 1          | 23     | 0.1  | 736         | 18          |
| Upper Trunk  | 0          | 0      | 0.0  | 0           | 0           | 0                 | 0     | 0.0  | 0           | 0           | 0          | 0      | 0.0  | 0           | 0           |
| Lower Trunk  | 4          | 173    | 0.7  | 8,306       | 882         | 3                 | 39    | 1.3  | 4,102       | 219         | 6          | 199    | 0.5  | 2,244       | 316         |
| Shoulder     | 172        | 11,762 | 50.6 | 226,729     | 145,211     | 26                | 1,546 | 51.9 | 50,344      | 25,121      | 128        | 6,211  | 14.9 | 33,889      | 20,004      |
| Humerus      | 0          | 0      | 0.0  | 0           | 0           | 0                 | 0     | 0.0  | 0           | 0           | 0          | 0      | 0.0  | 0           | 0           |
| Elbow        | 58         | 3,524  | 15.2 | 81,959      | 36,826      | 6                 | 397   | 13.3 | 22,581      | 3,656       | 145        | 6,114  | 14.7 | 32,434      | 20,302      |
| Forearm      | 2          | 132    | 0.6  | 14,628      | 294         | 1                 | 8     | 0.3  | 1,503       | 22          | 2          | 180    | 0.4  | 5,698       | 105         |
| Wrist        | 4          | 493    | 2.1  | 17,825      | 3,345       | 0                 | 0     | 0.0  | 0           | 0           | 1          | 22     | 0.1  | 719         | 18          |
| Hand         | 4          | 263    | 1.1  | 8,600       | 2,021       | 0                 | 0     | 0.0  | 0           | 0           | 1          | 9      | 0.0  | 281         | 0           |
| Finger       | 29         | 2,077  | 8.9  | 46,088      | 23,154      | 8                 | 372   | 12.5 | 21,143      | 3,474       | 35         | 1,552  | 3.7  | 11,010      | 3,857       |
| Hip/Femur    | 1          | 8      | 0.0  | 1,029       | 0           | 0                 | 0     | 0.0  | 0           | 0           | 0          | 0      | 0.0  | 0           | 0           |
| Knee         | 37         | 3,103  | 13.4 | 69,978      | 33,739      | 7                 | 592   | 19.9 | 24,595      | 7,889       | 419        | 25,211 | 60.6 | 116,605     | 95,479      |
| Ankle        | 16         | 1,024  | 4.4  | 24,624      | 10,548      | 0                 | 0     | 0.0  | 0           | 0           | 7          | 405    | 1.0  | 3,647       | 806         |
| Foot         | 2          | 46     | 0.2  | 3,161       | 147         | 0                 | 0     | 0.0  | 0           | 0           | 4          | 76     | 0.2  | 877         | 123         |
| Toe          | 11         | 626    | 2.7  | 17,935      | 5,403       | 1                 | 23    | 0.8  | 4,116       | 73          | 24         | 1,566  | 3.8  | 9,608       | 4,523       |

| Dislocations | Basketball |        |      |          |          | Baseball |        |      |          |          | Softball |       |      |          |          |
|--------------|------------|--------|------|----------|----------|----------|--------|------|----------|----------|----------|-------|------|----------|----------|
|              | n          | N      | %    | U 95% CL | L 95% CL | n        | N      | %    | U 95% CL | L 95% CL | n        | N     | %    | U 95% CL | L 95% CL |
| Face         | 14         | 487    | 0.3  | 4,636    | 959      | 1        | 22     | 0.1  | 1,231    | 28       | 3        | 106   | 0.4  | 3,572    | 115      |
| Upper Trunk  | 0          | 0      | 0.0  | 0        | 0        | 2        | 169    | 0.4  | 9,369    | 140      | 1        | 102   | 0.4  | 4,473    | 82       |
| Lower Trunk  | 6          | 299    | 0.2  | 4,076    | 400      | 6        | 471    | 1.2  | 7,831    | 1,454    | 1        | 9     | 0.0  | 377      | 0        |
| Shoulder     | 1,085      | 58,024 | 30.9 | 265,929  | 228,842  | 246      | 16,244 | 41.6 | 130,995  | 102,021  | 149      | 9,294 | 33.4 | 65,192   | 45,154   |
| Humerus      | 4          | 76     | 0.0  | 1,199    | 80       | 0        | 0      | 0.0  | 0        | 0        | 0        | 0     | 0.0  | 0        | 0        |
| Elbow        | 85         | 3,841  | 2.0  | 23,739   | 11,190   | 27       | 1,346  | 3.4  | 16,920   | 5,425    | 19       | 1,072 | 3.9  | 11,452   | 3,424    |
| Forearm      | 0          | 0      | 0.0  | 0        | 0        | 0        | 0      | 0.0  | 0        | 0        | 1        | 23    | 0.1  | 1,032    | 16       |
| Wrist        | 5          | 324    | 0.2  | 4,396    | 400      | 2        | 149    | 0.4  | 4,950    | 224      | 1        | 23    | 0.1  | 1,016    | 16       |
| Hand         | 12         | 335    | 0.2  | 3,677    | 560      | 3        | 303    | 0.8  | 6,712    | 699      | 4        | 307   | 1.1  | 8,700    | 360      |
| Finger       | 1,460      | 78,483 | 41.8 | 357,370  | 311,170  | 184      | 12,114 | 31.0 | 100,847  | 73,691   | 140      | 8,489 | 30.5 | 62,505   | 38,994   |
| Hip/Femur    | 2          | 99     | 0.1  | 2,558    | 80       | 0        | 0      | 0.0  | 0        | 0        | 0        | 0     | 0.0  | 0        | 0        |
| Knee         | 659        | 38,575 | 20.5 | 191,194  | 140,119  | 105      | 7,431  | 19.0 | 72,685   | 37,950   | 114      | 7,428 | 26.7 | 58,196   | 31,785   |
| Ankle        | 75         | 4,147  | 2.2  | 25,178   | 12,309   | 12       | 556    | 1.4  | 9,397    | 1,650    | 11       | 838   | 3.0  | 10,256   | 2,327    |
| Foot         | 6          | 375    | 0.2  | 4,156    | 639      | 0        | 0      | 0.0  | 0        | 0        | 2        | 115   | 0.4  | 3,195    | 147      |
| Toe          | 41         | 2,723  | 1.5  | 16,865   | 7,913    | 4        | 273    | 0.7  | 6,796    | 559      | 1        | 23    | 0.1  | 983      | 16       |

| Dislocations | Hockey |       |      |          |          | Football |        |      |          |          | Soccer |        |      |          |          |
|--------------|--------|-------|------|----------|----------|----------|--------|------|----------|----------|--------|--------|------|----------|----------|
|              | n      | N     | %    | U 95% CL | L 95% CL | n        | N      | %    | U 95% CL | L 95% CL | n      | N      | %    | U 95% CL | L 95% CL |
| Face         | 1      | 22    | 0.1  | 1,016    | 19       | 5        | 275    | 0.2  | 4,769    | 468      | 5      | 265    | 0.5  | 6,915    | 617      |
| Upper Trunk  | 0      | 0     | 0.0  | 0        | 0        | 1        | 10     | 0.0  | 374      | 0        | 2      | 115    | 0.2  | 4,536    | 176      |
| Lower Trunk  | 1      | 9     | 0.1  | 435      | 10       | 53       | 2,397  | 1.4  | 20,761   | 8,510    | 10     | 661    | 1.2  | 13,433   | 1,982    |
| Shoulder     | 179    | 9,915 | 66.5 | 73,742   | 53,431   | 1,136    | 61,970 | 36.8 | 379,306  | 311,226  | 293    | 13,971 | 25.0 | 126,094  | 95,264   |
| Humerus      | 0      | 0     | 0.0  | 0        | 0        | 3        | 167    | 0.1  | 4,021    | 187      | 0      | 0      | 0.0  | 0        | 0        |
| Elbow        | 7      | 268   | 1.8  | 4,848    | 610      | 194      | 7,800  | 4.6  | 52,276   | 35,911   | 105    | 5,172  | 9.2  | 51,750   | 31,799   |
| Forearm      | 0      | 0     | 0.0  | 0        | 0        | 6        | 288    | 0.2  | 4,863    | 561      | 1      | 9      | 0.0  | 529      | 0        |
| Wrist        | 0      | 0     | 0.0  | 0        | 0        | 13       | 811    | 0.5  | 8,604    | 2,338    | 6      | 204    | 0.4  | 5,373    | 484      |
| Hand         | 1      | 85    | 0.6  | 2,990    | 97       | 14       | 475    | 0.3  | 4,956    | 1,403    | 5      | 221    | 0.4  | 6,871    | 440      |
| Finger       | 18     | 1,264 | 8.5  | 18,172   | 3,464    | 1,143    | 62,576 | 37.2 | 385,852  | 311,600  | 208    | 10,561 | 18.9 | 98,964   | 69,279   |
| Hip/Femur    | 0      | 0     | 0.0  | 0        | 0        | 3        | 43     | 0.0  | 842      | 94       | 0      | 0      | 0.0  | 0        | 0        |
| Knee         | 40     | 3,082 | 20.7 | 29,019   | 13,256   | 438      | 28,862 | 17.2 | 213,687  | 118,393  | 348    | 21,109 | 37.7 | 197,355  | 137,061  |
| Ankle        | 2      | 156   | 1.0  | 4,567    | 223      | 20       | 908    | 0.5  | 12,625   | 2,057    | 21     | 1,164  | 2.1  | 13,389   | 6,254    |
| Foot         | 0      | 0     | 0.0  | 0        | 0        | 7        | 383    | 0.2  | 5,518    | 842      | 1      | 128    | 0.2  | 5,461    | 176      |
| Toe          | 1      | 102   | 0.7  | 5,128    | 77       | 25       | 1,216  | 0.7  | 10,754   | 4,302    | 41     | 2,385  | 4.3  | 29,244   | 11,936   |

| Dislocations | Racquet Sports |       |      |          |          | Volleyball |       |      |          |          | Track/Field |       |      |          |          |
|--------------|----------------|-------|------|----------|----------|------------|-------|------|----------|----------|-------------|-------|------|----------|----------|
|              | n              | N     | %    | U 95% CL | L 95% CL | n          | N     | %    | U 95% CL | L 95% CL | n           | N     | %    | U 95% CL | L 95% CL |
| Face         | 1              | 21    | 0.3  | 739      | 14       | 1          | 137   | 0.5  | 2,136    | 75       | 0           | 0     | 0.0  | 0        | 0        |
| Upper Trunk  | 0              | 0     | 0.0  | 0        | 0        | 0          | 0     | 0.0  | 0        | 0        | 0           | 0     | 0.0  | 0        | 0        |
| Lower Trunk  | 0              | 0     | 0.0  | 0        | 0        | 1          | 135   | 0.5  | 2,113    | 75       | 1           | 9     | 0.2  | 431      | 9        |
| Shoulder     | 67             | 3,974 | 51.9 | 22,531   | 14,095   | 127        | 8,897 | 35.4 | 32,481   | 21,402   | 23          | 991   | 22.0 | 11,082   | 3,465    |
| Humerus      | 0              | 0     | 0.0  | 0        | 0        | 1          | 23    | 0.1  | 521      | 8        | 0           | 0     | 0.0  | 0        | 0        |
| Elbow        | 5              | 225   | 2.9  | 2,732    | 382      | 6          | 302   | 1.2  | 2,951    | 272      | 4           | 261   | 5.8  | 5,817    | 449      |
| Forearm      | 0              | 0     | 0.0  | 0        | 0        | 0          | 0     | 0.0  | 0        | 0        | 1           | 127   | 2.8  | 4,808    | 127      |
| Wrist        | 0              | 0     | 0.0  | 0        | 0        | 1          | 146   | 0.6  | 2,279    | 83       | 2           | 115   | 2.6  | 3,716    | 142      |
| Hand         | 1              | 118   | 1.5  | 3,895    | 71       | 0          | 0     | 0.0  | 0        | 0        | 0           | 0     | 0.0  | 0        | 0        |
| Finger       | 12             | 625   | 8.2  | 6,238    | 1,258    | 128        | 8,608 | 34.2 | 30,738   | 21,312   | 3           | 237   | 5.3  | 5,162    | 425      |
| Hip/Femur    | 0              | 0     | 0.0  | 0        | 0        | 0          | 0     | 0.0  | 0        | 0        | 0           | 0     | 0.0  | 0        | 0        |
| Knee         | 37             | 2,511 | 32.8 | 16,092   | 7,850    | 91         | 5,498 | 21.8 | 22,187   | 11,931   | 31          | 2,633 | 58.6 | 22,010   | 11,949   |
| Ankle        | 0              | 0     | 0.0  | 0        | 0        | 14         | 940   | 3.7  | 5,728    | 1,358    | 1           | 124   | 2.8  | 5,480    | 103      |
| Foot         | 0              | 0     | 0.0  | 0        | 0        | 3          | 130   | 0.5  | 1,494    | 98       | 0           | 0     | 0.0  | 0        | 0        |
| Toe          | 2              | 178   | 2.3  | 5,015    | 120      | 7          | 346   | 1.4  | 2,370    | 453      | 0           | 0     | 0.0  | 0        | 0        |

| Dislocations | Combative |        |      |          |          | Swimming |        |      |          |          | Waterski/Surfboarding |       |      |          |          |
|--------------|-----------|--------|------|----------|----------|----------|--------|------|----------|----------|-----------------------|-------|------|----------|----------|
|              | n         | N      | %    | U 95% CL | L 95% CL | n        | N      | %    | U 95% CL | L 95% CL | n                     | N     | %    | U 95% CI | L 95% CI |
| Face         | 2         | 127    | 0.3  | 3,456    | 86       | 1        | 23     | 0.1  | 564      | 9        | 0                     | 0     | 0.0  | 0        | 0        |
| Upper Trunk  | 1         | 114    | 0.3  | 3,473    | 69       | 0        | 0      | 0.0  | 0        | 0        | 0                     | 0     | 0.0  | 0        | 0        |
| Lower Trunk  | 1         | 9      | 0.0  | 275      | 0        | 10       | 459    | 1.6  | 3,508    | 611      | 1                     | 64    | 0.5  | 2,152    | 18       |
| Shoulder     | 301       | 18,807 | 45.5 | 86,858   | 69,785   | 258      | 19,217 | 65.5 | 67,687   | 54,887   | 83                    | 8,982 | 75.6 | 30,620   | 22,226   |
| Humerus      | 0         | 0      | 0.0  | 0        | 0        | 0        | 0      | 0.0  | 0        | 0        | 0                     | 0     | 0.0  | 0        | 0        |
| Elbow        | 166       | 10,032 | 24.3 | 49,274   | 35,039   | 70       | 3,656  | 12.5 | 17,672   | 7,571    | 2                     | 258   | 2.2  | 2,034    | 294      |
| Forearm      | 4         | 252    | 0.6  | 3,903    | 275      | 3        | 352    | 1.2  | 5,483    | 226      | 0                     | 0     | 0.0  | 0        | 0        |
| Wrist        | 2         | 32     | 0.1  | 636      | 34       | 1        | 24     | 0.1  | 574      | 9        | 0                     | 0     | 0.0  | 0        | 0        |
| Hand         | 7         | 712    | 1.7  | 5,742    | 1,513    | 0        | 0      | 0.0  | 0        | 0        | 0                     | 0     | 0.0  | 0        | 0        |
| Finger       | 70        | 3,656  | 8.8  | 20,081   | 11,433   | 27       | 1,739  | 5.9  | 9,527    | 3,198    | 6                     | 406   | 3.4  | 2,858    | 509      |
| Hip/Femur    | 0         | 0      | 0.0  | 0        | 0        | 0        | 0      | 0.0  | 0        | 0        | 1                     | 118   | 1.0  | 3,191    | 36       |
| Knee         | 109       | 6,479  | 15.7 | 33,388   | 21,560   | 52       | 3,482  | 11.9 | 16,524   | 7,373    | 23                    | 1,961 | 16.5 | 8,609    | 3,939    |
| Ankle        | 0         | 0      | 0.0  | 0        | 0        | 1        | 118    | 0.4  | 2,718    | 47       | 0                     | 0     | 0.0  | 0        | 0        |
| Foot         | 0         | 0      | 0.0  | 0        | 0        | 0        | 0      | 0.0  | 0        | 0        | 0                     | 0     | 0.0  | 0        | 0        |
| Toe          | 18        | 1,104  | 2.7  | 6,688    | 3,129    | 7        | 277    | 0.9  | 2,558    | 301      | 1                     | 85    | 0.7  | 2,188    | 29       |

| Dislocations | Snow Skiing |        |      |          |          |
|--------------|-------------|--------|------|----------|----------|
|              | n           | N      | %    | U 95% CL | L 95% CL |
| Face         | 0           | 0      | 0.0  | 0        | 0        |
| Upper Trunk  | 0           | 0      | 0.0  | 0        | 0        |
| Lower Trunk  | 2           | 133    | 0.3  | 3,886    | 161      |
| Shoulder     | 347         | 29,905 | 68.6 | 206,127  | 157,778  |
| Humerus      | 1           | 21     | 0.0  | 1,179    | 27       |
| Elbow        | 26          | 2,307  | 5.3  | 25,675   | 7,665    |
| Forearm      | 1           | 69     | 0.2  | 1,688    | 107      |
| Wrist        | 3           | 280    | 0.6  | 8,469    | 348      |
| Hand         | 1           | 129    | 0.3  | 7,612    | 80       |
| Finger       | 23          | 1,834  | 4.2  | 15,652   | 8,067    |
| Hip/Femur    | 0           | 0      | 0.0  | 0        | 0        |
| Knee         | 127         | 8,922  | 20.5 | 96,725   | 28,114   |
| Ankle        | 0           | 0      | 0.0  | 0        | 0        |
| Foot         | 0           | 0      | 0.0  | 0        | 0        |
| Toe          | 0           | 0      | 0.0  | 0        | 0        |
