# Supplementary material
Source: PubMed Central journal article supplement (PMC7040946)
Supplement: Appendix_1.pdf [file Appendix_1.pdf]

## APPENDIX 1

Pubmed was searched using:

((SPORTS) OR (Exercise/ or ATHLETES/) OR (performance enhancement or performance-enhancing substances/)) AND ((marijuana) OR (tetrahydrocannabinol) OR (cannabis))

Medline and Embase were searched using:

#1 SPORTS/

#2 Exercise/ or ATHLETES/

#3 exp CANNABIS/

#4 marijuana.mp.

#5 Tetrahydrocannabinol.mp.

#6 ATHLETIC PERFORMANCE/

#7 performance enhancement.mp. or Performance-Enhancing Substances/

#8 3 or 4 or 5

#9 1 or 2 or 6 or 7

#10 8 and 9

#11 limit 10 to (English language and humans)
